# Supplementary material for: Riverbank Erosion and Migration, Inter-Linkage: with special focus on Assam, India
Source: Research Square preprint supplement (doi:10.21203/rs.3.rs-50748/v3), 2020-12-18
Supplement: Supplementary file 1 [file 0bfc07e64cb723f3ad656110.xlsx]

## Sheet: Sheet1
NGI	MGI	Literacy rate	Urban Population	Rural Population	Population Growth	Agriculture Workers	Industrial Workers	Cropped Area	Riverbank eroded Area	Livestock Population	FAC1-1	FAC2-1	FAC3-1	FAC4-1
1.33511	-0.513968	13.59	0.09	-0.09	-9.28	-20.47	-2.23	7.81	0	1.56549	-0.93686	-0.489609	1.46542	-0.964068
0.150777	-1.27209	10.13	-1.84	1.84	1.47	-6.76	-1.19	12.78	-0.27	-1.0706	-0.171168	-1.27878	0.0884962	0.848289
0.202986	1.97644	9.34	5.56	-5.56	-0.39	-9.79	-3.24	10.36	-0.09	-11.8832	-0.763332	2.01043	0.304207	0.139294
-0.489521	-0.660603	7.57	-0.4	0.4	1.81	-7.1	-2.96	32.99	-0.13	2.49593	-0.0845425	-0.568977	-0.406438	0.521577
0.133524	0.699896	9.5	2.76	-2.76	1.99	-10.58	-1.8	27.33	-0.63	0.195495	-0.262222	0.591242	-0.247385	2.06221
0.595411	-0.0443998	10.64	1.06	-1.06	-0.26	-10.91	-1.57	-16.47	-0.03	2.98442	-0.658787	-0.0439055	0.66426	0.0919131
-0.591705	-1.2022	8.34	-1.52	1.52	-2.56	-8.49	-1.54	0.47	-0.04	14.3235	-0.180417	-1.22346	-0.375983	-0.0334839
-0.273563	0.144112	8.64	1.44	-1.44	-1.08	-6.35	-2.52	20.68	-0.14	11.627	-0.0643375	0.126952	-0.177903	0.39121
-0.429556	-0.38264	8.22	0.25	-0.25	0.52	-9.34	-2.84	4.88	-0.64	4.13444	-0.550968	-0.570562	-0.826261	2.08898
-0.128134	-0.336127	8.71	0.46	-0.46	-4.04	-3.48	-0.89	0.29	0.01	4.65798	-0.0459605	-0.338656	-0.119447	-0.46448
-1.3553	-0.919899	7.09	-0.9	0.9	-1.76	-4.9	-1.44	-2.97	-0.39	1.73296	-0.288641	-1.06509	-1.34025	1.0251
-1.08847	-0.377238	5.94	0.32	-0.32	-6.39	-5.98	-2.63	-1.58	-0.02	0.00669	-0.440522	-0.41939	-1.07857	-0.552348
-1.19369	0.827695	5.82	3.05	-3.05	-5.38	-5.4	-1.91	7.34	-0.11	-3.09627	-0.278787	0.759081	-1.18576	-0.237282
-0.787871	-0.284084	8.05	0.59	-0.59	-1.52	-7.29	-1.7	8.2	0.02	-0.512445	-0.276591	-0.223308	-0.415178	-0.27514
0.566215	-0.319035	11.55	0.51	-0.51	-5.14	-11.72	-3.35	0.28	0	7.86368	-0.728763	-0.303696	0.794739	-0.414226
-0.482828	-1.63818	9.92	-2.41	2.41	-10.88	-3.61	-2	3.17	0	-10.5821	-0.463354	-1.62858	-0.276967	-1.25514
0.775779	1.37791	11.52	4.23	-4.23	1.3	-9.26	-1.7	1.6	0	-32.2543	-0.928492	1.52092	0.978693	-0.254784
0.617648	0.213155	11.98	1.6	-1.6	0.03	-6.98	-3.03	1.9	0	2.84645	-0.554873	0.2662	0.969991	0.0248724
1.10022	-0.858997	14.69	-0.82	0.82	0.56	-7.86	-2.17	7.4	0	-5.73247	-0.569071	-0.737111	1.61839	-0.0971433
0.857284	-0.957118	10.41	-1	1	-1.5	-9.3	-1.35	30.39	-0.01	-16.322	-0.257133	-0.769374	0.706275	-0.467497
1.98878	0.282749	10.94	1.55	-1.55	11.26	11.43	3.05	46.14	0	62.1477	2.49877	0.310939	1.50205	1.34884
-2.75038	1.64538	1.39	4.96	-4.96	0.72	-0.89	0.29	11.45	-0.11	6.29865	0.479355	1.56757	-2.57607	0.407131
-0.419289	0.458072	5.5	2.47	-2.47	-27.57	2	1.93	52.33	0	0	1.0753	0.310056	-1.36203	-3.04971
0.132382	2.49446	11.4	6.73	-6.73	-2.22	-8.48	-3.23	23.03	0.04	-4.37316	-0.533031	2.54382	0.762531	-0.401559
1.02273	0.202899	9.68	1.29	-1.29	-1.77	15.97	3.75	54.47	0	39.3485	2.48123	0.118933	0.469733	-0.222071
-0.603366	-0.229997	7.64	0.49	-0.49	0.01	-0.82	-2.43	15.1	0.02	-6.02474	-0.111704	-0.158993	-0.41545	-0.184461
1.11481	-0.326199	9.01	0.15	-0.15	-0.41	14.27	2.47	78.98	0	43.019	2.61491	-0.306641	0.478898	-0.076028
